# Supplementary material for: Donor-derived hepatocytes in human hematopoietic cell transplant recipients: evidence of fusion
Source: Springer Nature journal article supplement (doi:10.1007/s00428-018-2497-8), 2018-12-12
Supplement: MOESM2 [file 16336174]

## Sheet: Xchi 1a
Online Resource 2		CAM5.2 POSITIVE HEPATOCYTES WITH X,Y ISH
Best fit example		WITHOUT Y SIGNAL (CELLS PER SLIDE by sampling)
			O	X	XX	XXX	XXXX	Total nuclei
slide 1a	observed enumeration		246	655	293	22	3	1219
	pX	0.510657
	qX	0.489343
	pTET	0.0600729
	qTET	0.939927
	tetraploid calculation	pTET*(pX+qX)^4	pTET*qX*qX*qX*qX	pTET*4*pX*qX*qX*qX	pTET*6*pX*pX*qX*qX	pTET*4*pX*pX*pX*qX	pTET*pX*pX*pX*pX
	diploid calculation	qTET*(pX+qX)^2	qTET*qX*qX	qTET*2*pX*qX	qTET*pX*pX
	predicted tetraploid fraction		0.00344455	0.0143783	0.0225069	0.0156581	0.00408502	0.0600729
	predicted diploid fraction		0.225072	0.46975	0.245105			0.939927
	predicted total fraction		0.228517	0.484128	0.267612	0.0156581	0.00408502	1
	predicted total enumeration		278.562	590.153	326.219	19.0872	4.97964	1219
	Best fit Chi2 (pX,pTET) p=	0.00369298
	Solver to max Chi2 p value, while adjusting pX, pTET
